# Supplementary material for: Revisiting large volume injection in non-miscible diluents: an on-line reversed phase supported liquid extraction/liquid chromatography scenario
Source: Royal Society of Chemistry journal article supplement (doi:10.1039/c4ay02332c), 2014-11-20
Supplement: c4ay02332c1.pdf [file c4ay02332c1.pdf]

**Electronic Supplementary Information, Part 1(a)**

Peak shapes of target compounds on injection of progressive volumes (1, 5, 10, 20, 50, 100  $\mu\text{L}$ ) in heptane.

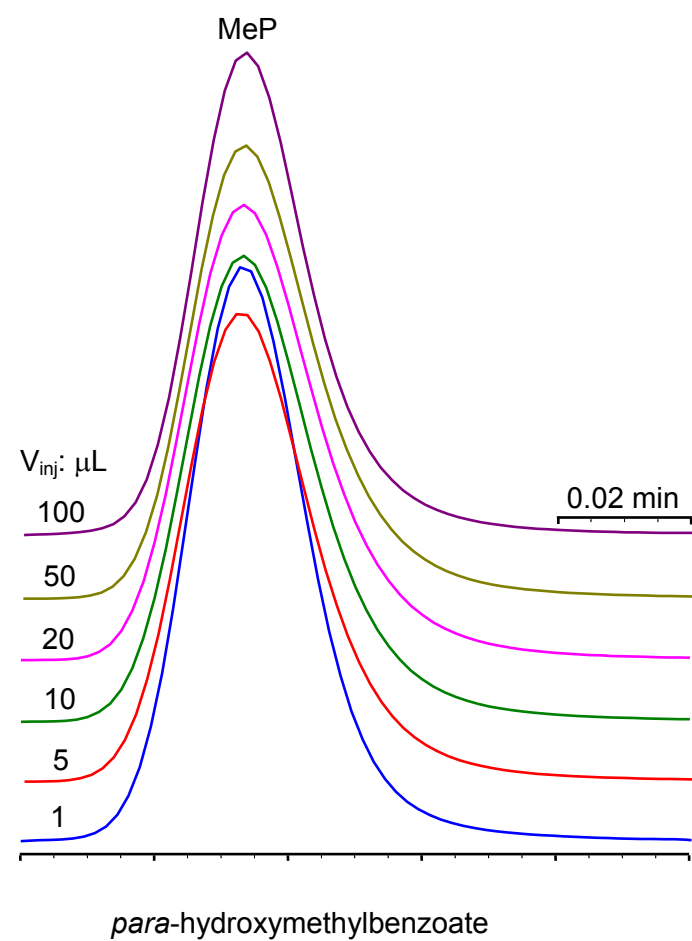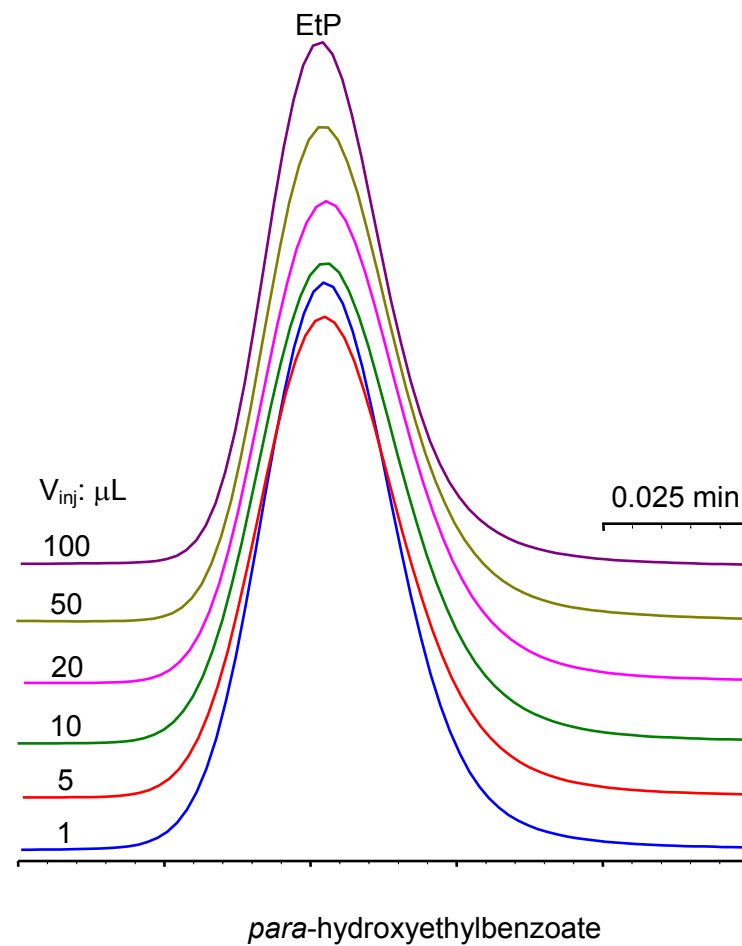

**Electronic Supplementary Information, Part 1(b)**

Peak shapes of target compounds on injection of progressive volumes (1, 5, 10, 20, 50, 100  $\mu\text{L}$ ) in heptane.

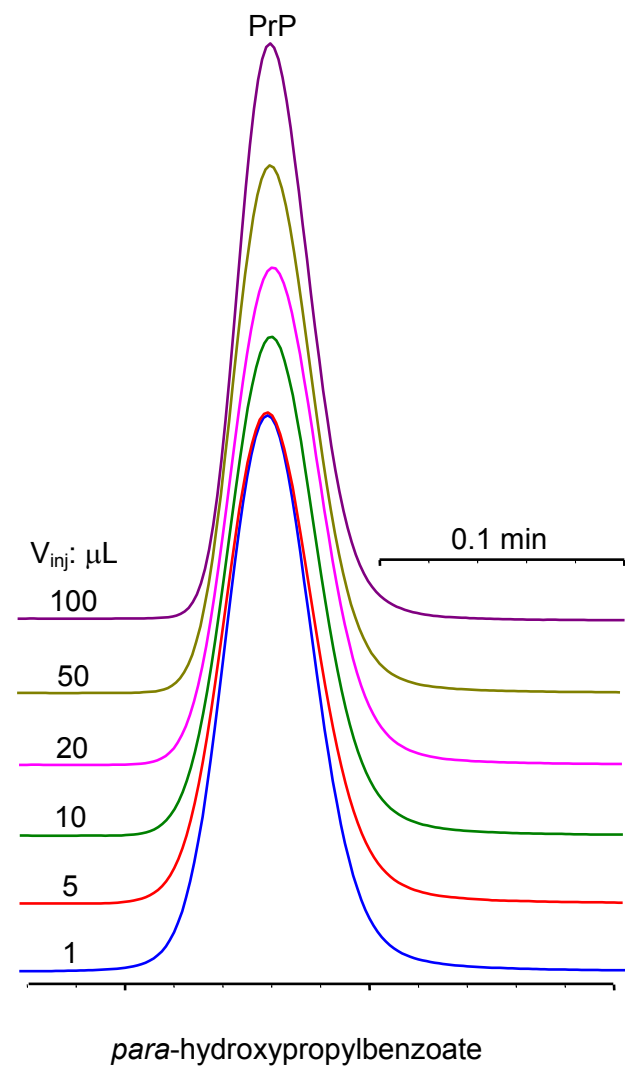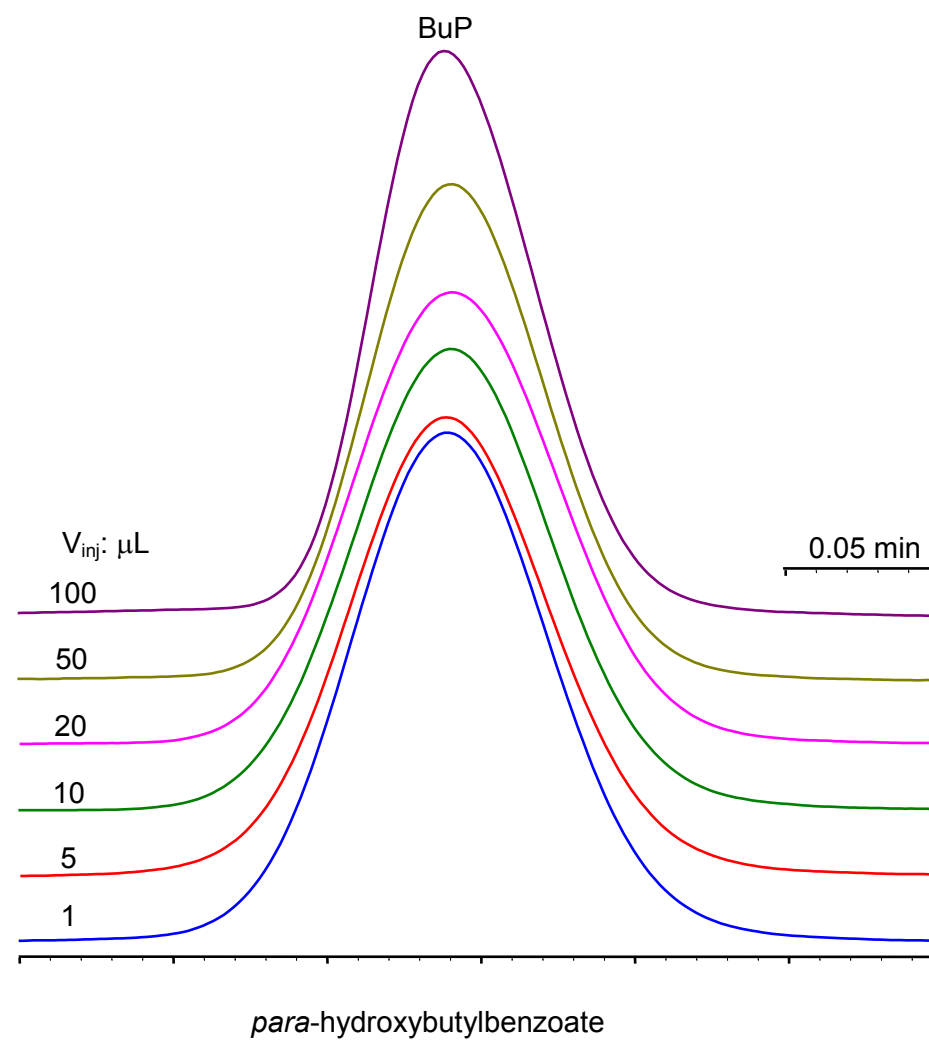

**Electronic Supplementary Information, Part 1(c)**

Peak shapes of target compounds on injection of progressive volumes (1, 5, 10, 20, 50, 100  $\mu\text{L}$ ) in heptane.

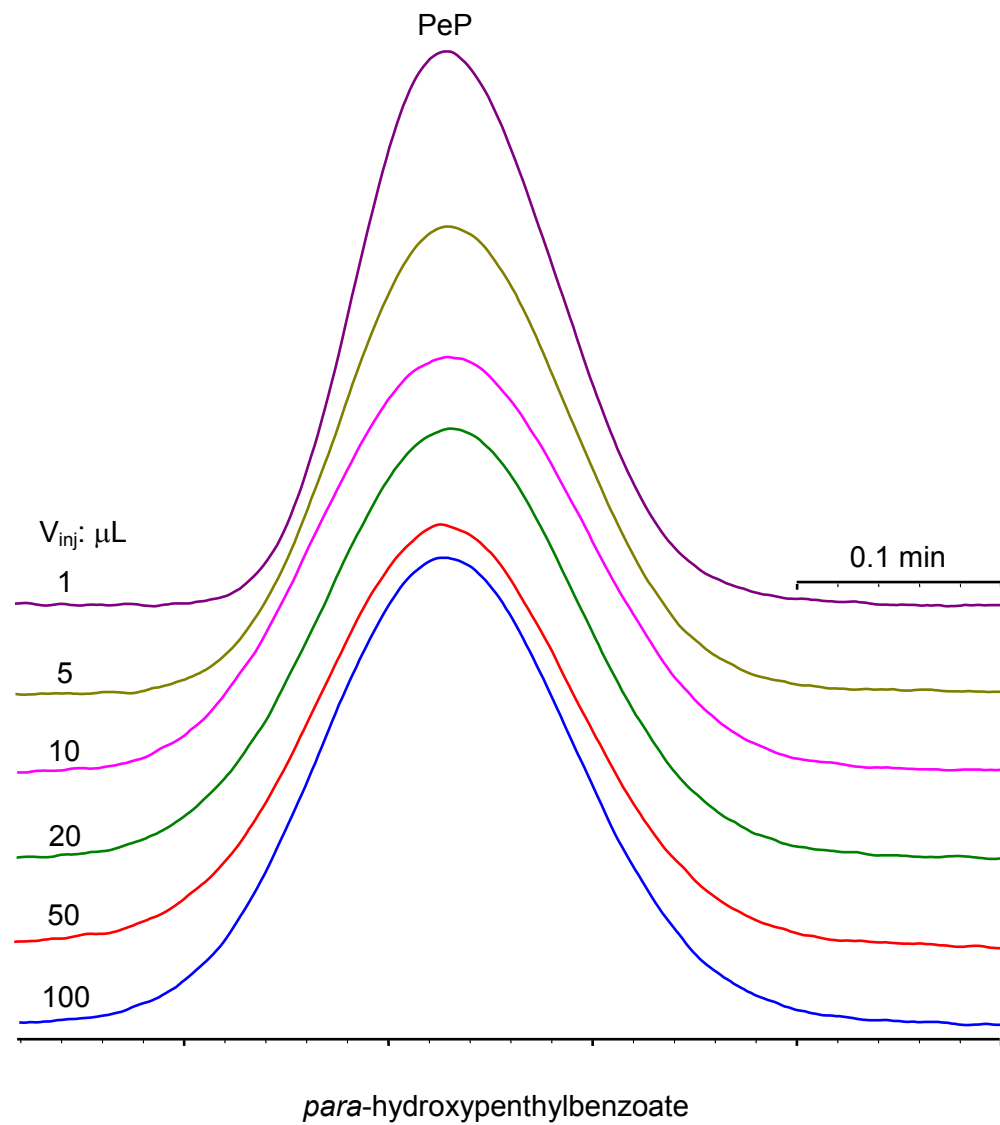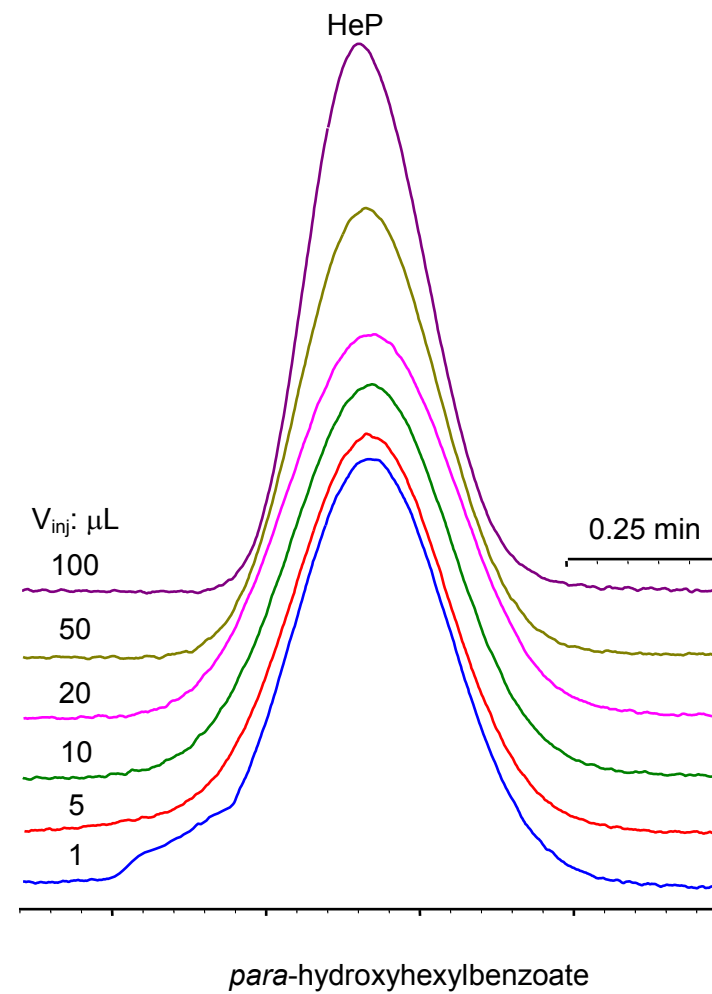

**Electronic Supplementary Information, Part 2**

First two eluting compounds on injection of increased volumes (1, 5, 10, 20, 50, 100  $\mu\text{L}$ ) in the mobile phase.

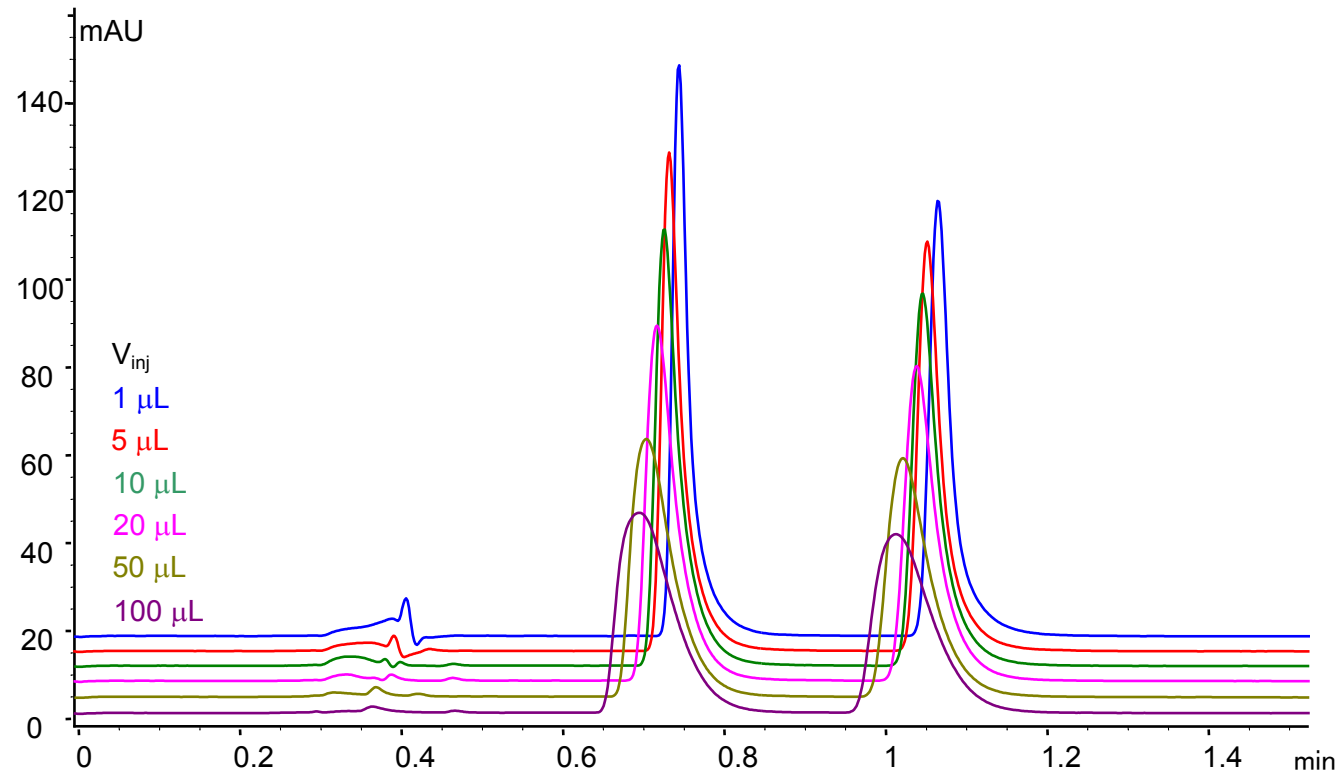

**Electronic Supplementary Information, Part 3**

Overlaid chromatograms resulting after injection of 100  $\mu\text{L}$  of the mixture of the compounds in heptane (UV detection, 270 nm trace) and 100  $\mu\text{L}$  heptane (Refractive Index Detector trace)..

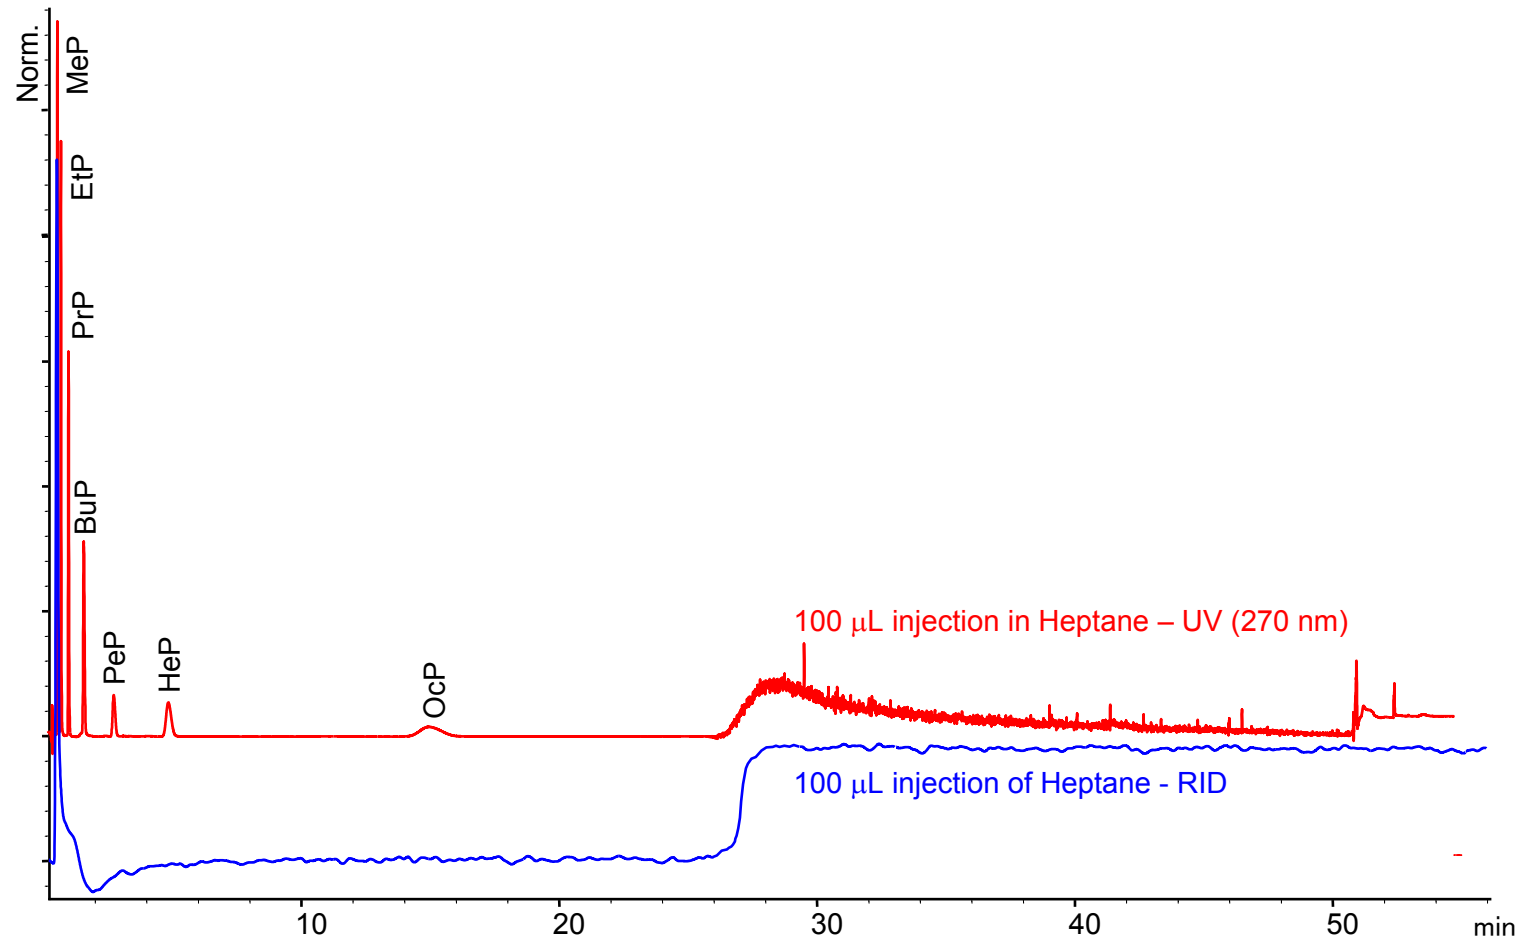

**Electronic Supplementary Information, Part 4(a)**

Retention behavior of the target analytes when using a mobile phase saturated with the diluent (example refers to the saturation with heptane of the mobile phase).

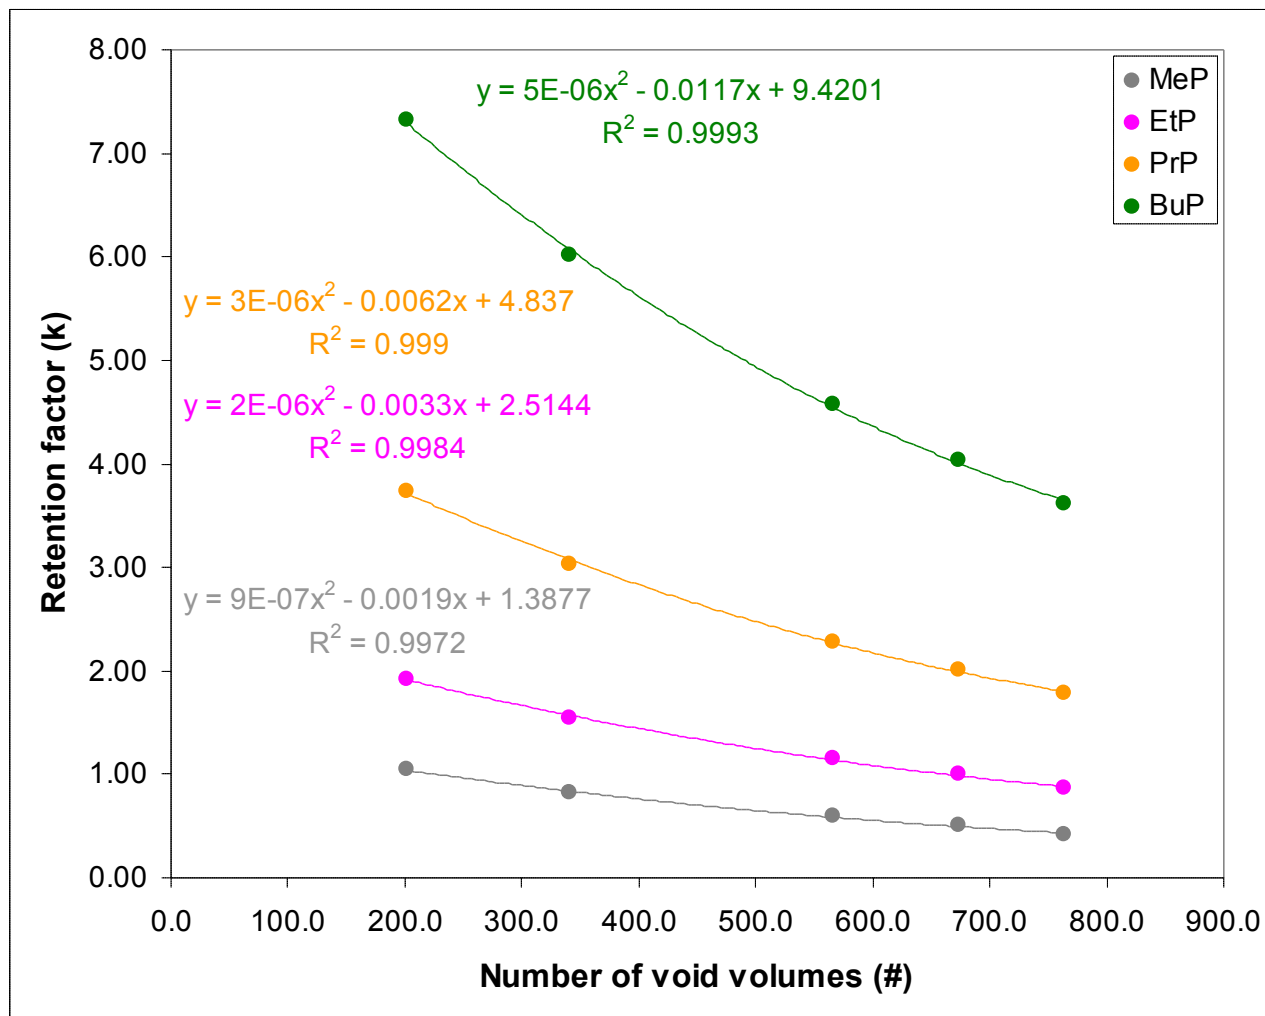

Electronic Supplementary Information, Part 4(b)

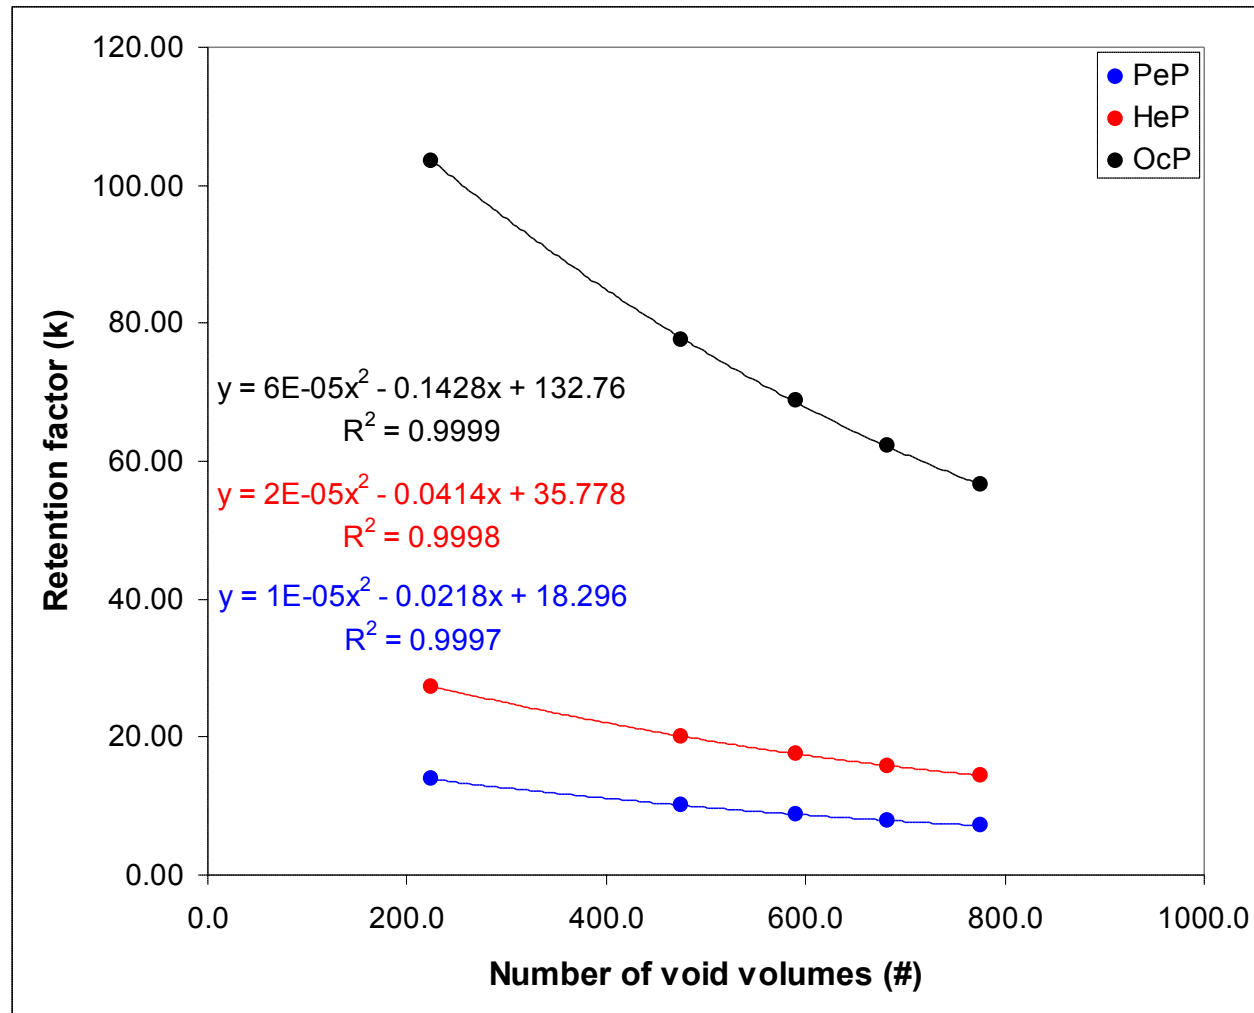

**Electronic Supplementary Information, Part 5**

Van't Hoff plots obtained for *para*-hydroxybutyl benzoate (BuP) when injecting 1  $\mu\text{L}$  of a solution in methanol or increased volumes of solutions in heptane.

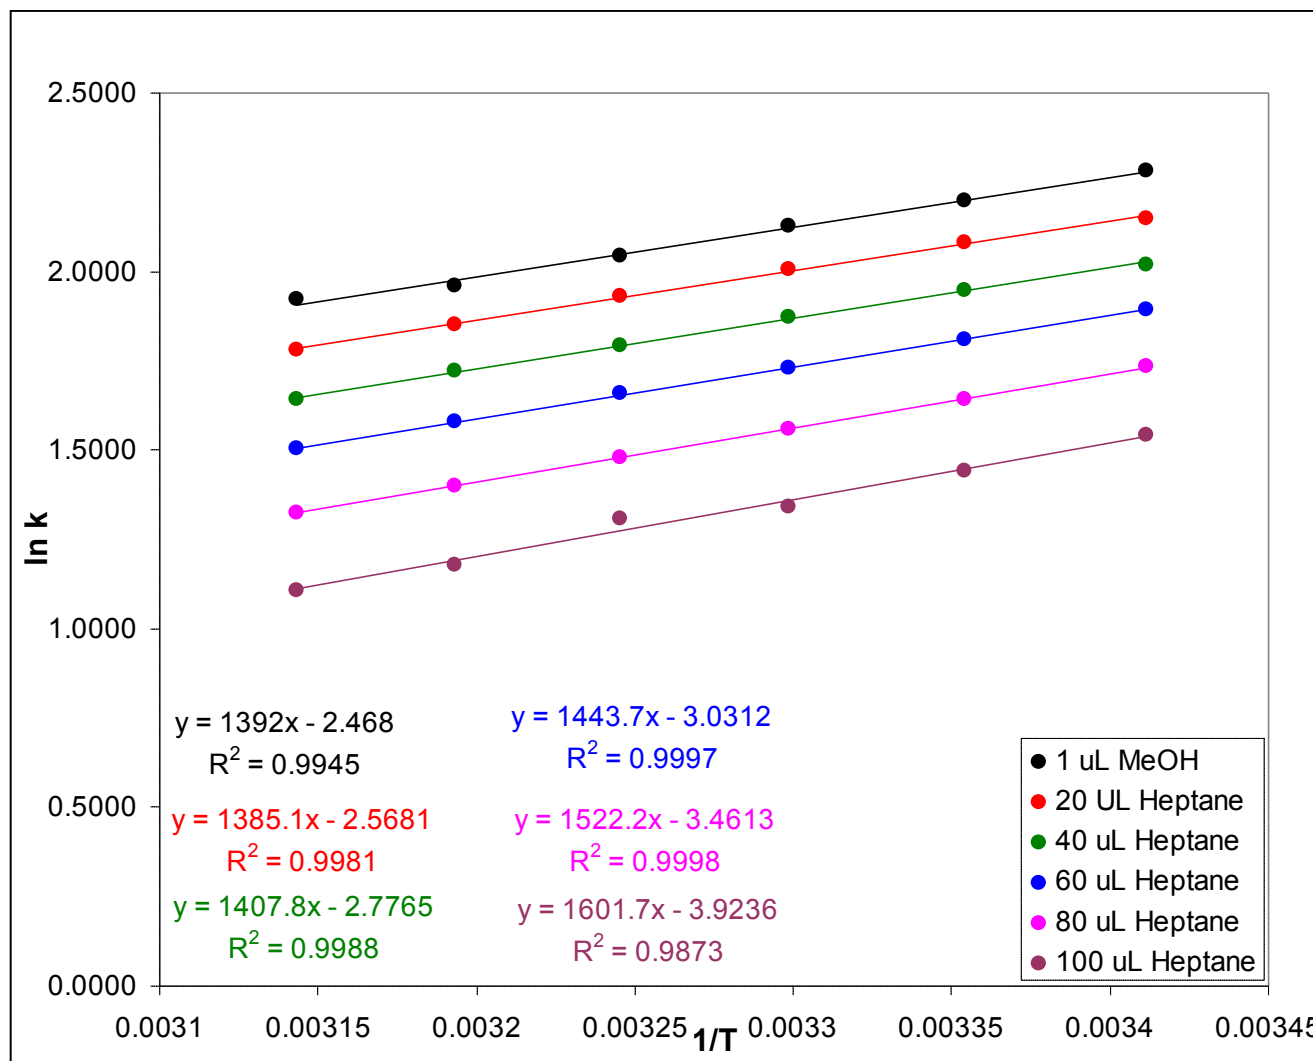



### Electronic Supplementary Information, Part 6

Compensation plot illustrating the progressive increase of injection volumes in heptane from 20 to 100  $\mu\text{L}$  (closed circles). The red circle corresponds to injection of 1  $\mu\text{L}$  of the analyte's (BuP) solution in methanol. The capacity factors on the ordinate were evaluated at 303.15 K (near the harmonic mean of the experimental temperature values used during the van't Hoff study: 305.41 K).

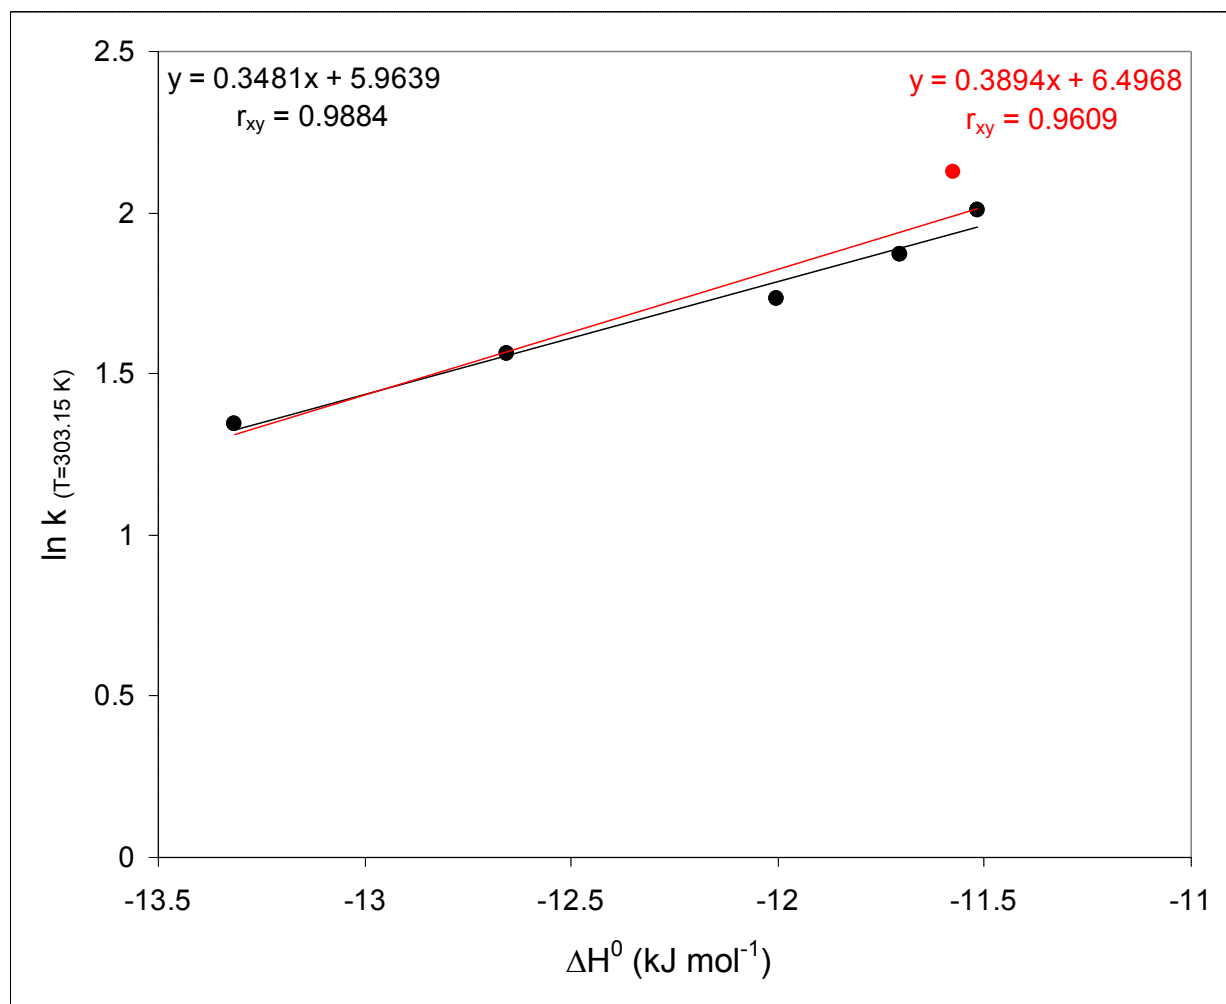

**Electronic Supplementary Information, Part 7**

Functional correlations between computed  $\log K_{ow}$  values of the target compounds and the logarithms of the absolute values of the slopes describing the linear relationships  $k_{app}=f(\alpha)$ .

| Analyte                 | $\log K_{ow}$ | $\log ( K/2 - tk )$ |         |                        |         |          | Average | s        | RSD% |
|-------------------------|---------------|---------------------|---------|------------------------|---------|----------|---------|----------|------|
|                         |               | Hexane              | Heptane | <i>Iso</i> -<br>Octane | Decane  | Dodecane |         |          |      |
| MeP                     | 1.997         | 0.37785             | 0.36071 | 0.32521                | 0.30651 | 0.32976  | 0.3400  | 0.028752 | 8.46 |
| EtP                     | 2.488         | 0.71130             | 0.70286 | 0.68092                | 0.69631 | 0.70773  | 0.6998  | 0.011969 | 1.71 |
| PrP                     | 2.979         | 1.03790             | 1.02999 | 1.01561                | 1.04544 | 1.04025  | 1.0338  | 0.011611 | 1.12 |
| BuP                     | 3.470         | 1.34974             | 1.34094 | 1.33015                | 1.36182 | 1.34465  | 1.3455  | 0.011636 | 0.86 |
| PeP                     | 3.961         | 1.66129             | 1.65149 | 1.64248                | 1.67431 | 1.66371  | 1.6587  | 0.012149 | 0.73 |
| HeP                     | 4.452         | 1.98142             | 1.96975 | 1.96401                | 1.99883 | 1.98901  | 1.9806  | 0.014115 | 0.71 |
| OcP                     | 5.434         | 2.59436             | 2.61396 | 2.61205                | 2.64831 | 2.64869  | 2.6235  | 0.024091 | 0.92 |
|                         |               |                     |         |                        |         |          |         |          |      |
| Slope                   |               | 0.6437              | 0.6512  | 0.6600                 | 0.6728  | 0.6661   | 0.6588  | 0.011568 | 1.76 |
| Intercept               |               | -0.8913             | -0.9240 | -0.9694                | -0.9916 | -0.9690  | -0.9490 | 0.040591 | 4.28 |
| Correlation coefficient |               | 0.9999              | 0.9999  | 0.9998                 | 0.9995  | 0.9997   |         |          |      |
